# Supplementary material for: Endogenous zebrafish proneural Cre drivers generated by CRISPR/Cas9 short homology directed targeted integration
Source: PubMed Central journal article supplement (PMC7813866; doi:10.1038/s41598-021-81239-y), 2021-01-18
Supplement: 41598_2021_81239_MOESM1_ESM.pdf [file 41598_2021_81239_MOESM1_ESM.pdf]

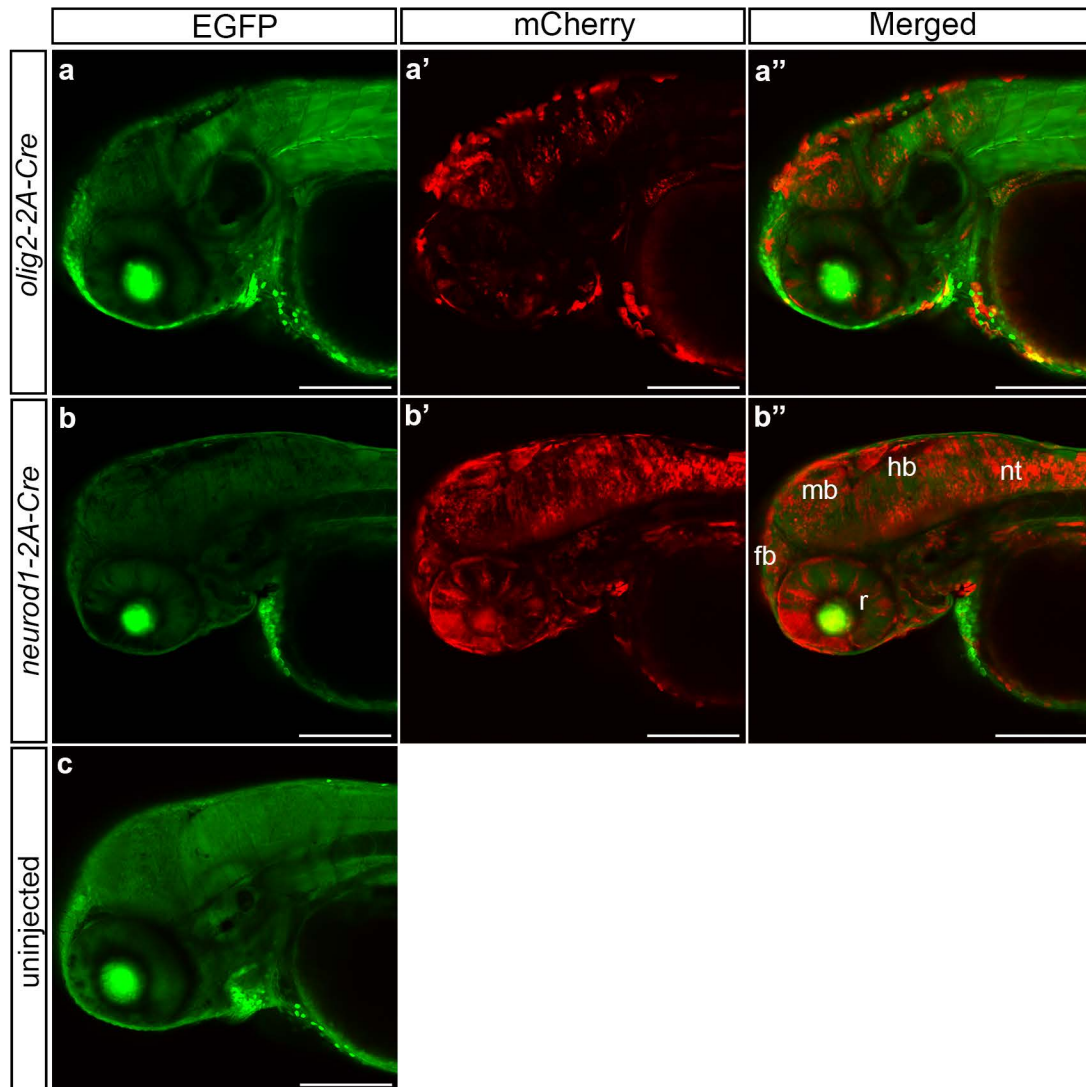

**Supplementary Figure S1.** CRISPR/Cas9 targeted integration of *olig2-2A-Cre* and *neurod1-2A-Cre* cassettes leads to efficient Cre-*loxP* recombination in F0 mosaic animals. (a) 3 dpf *ubi:Switch* embryos that were injected with Cas9 mRNA, *olig2* exon 2 sgRNA, the universal guide RNA UgRNA, and *olig2-2A-Cre* donor vector show a switch from EGFP to mCherry expression in the midbrain, hindbrain, and neural tube, indicating Cre-mediated excision of the floxed EGFP cassette. (b) Embryos injected with Cas9 mRNA, *neurod1* exon 2 sgRNA, the universal guide RNA UgRNA, and the *neurod1-2A-Cre* targeting vector show the EGFP to mCherry switch in presumed neurons throughout the entire developing central nervous system, including the retina. (c) Uninjected animals express only EGFP. EGFP, green fluorescent protein; fb, forebrain; hb, hindbrain; mb, midbrain; nt, neural tube; r, retina. Scale bar 100  $\mu$ m.

### 5' junctions

*ascl1b* ← 48 bp homology arm → vector  
Reference TACCGAACGGAGCGGCGAACAAGAAGATGAGCAAAGTGGAGACGCTGCGCTCCGGGCCTTCCC  
F0#3, F1#1 TACCGAACGGAGCGGCGAACAAGAAGATGAGCAAAGTGGAGACGCTGCGCTCCGGGCCTTCCC

*olig2* ← 48 bp homology arm → vector  
Reference ACTCCTCAAAGCCCCGTCAGCCGGCGCTGGGCCTCTGGGCGCGGGTTCCAGCAGAGCCTTCCC  
F0#20, F1#1 ACTCCTCAAAGCCCCGTCAGCCGGCGCTGGGCCTCTGGGCGCGGGTTCCAGCAGCTTCCC  
F0#20, F1#2 ACTCCTCAAAGCCCCGTCAGCCGGCGCTGGGCCTCTGGGCGCGGGTTCCAGCAGCTTCCC

*neurod1* ← 48 bp homology arm → vector  
Reference AAACAGCAAGTGCTTCCTTTTCCGCTCTTCCCTACTCCTACCAGACGCCCGGTCTGTCCTTCCC  
F0#1, F1#1 AAACAGCAAGTGCTTCCTTTTCCGCTCTTCCCTACTCCTACCAGACGCCCGGTCTGTCTTCCC  
F0#1, F1#2 AAACAGCAAGTGCTTCCTTTTCCGCTCTTCCCTACTCCTACCAGACGCCCGGTCTGTCTTCCC

### 3' junctions

vector ← 48 bp homology arm → *ascl1b*  
Reference AGGAAGCCGTGGAGTACATCCGAGCCCTGCAGCAGCTGCTGGACGAGCACGACGCCCGTGT  
F0#3, F1#1 AGGAAGCCGTGGAGTACATCCGAGCCCTGCAGCAGCTGCTGGACGAGCACGACGCCCGTGT

vector ← 48 bp homology arm → *olig2*  
Reference AGGAAGCTGGGGTGC GGGGATCCCTTGTCCGTGTAGCATGTGCCAGGTGCCTCCCGTCTCA  
F0#20, F1#1 AGGAAGCTGGGGTGC GGGGATCCCTTGTCCGTGTAGCATGTGCCAGGTGCCTCCGTCTCA  
F0#20, F1#2 AGGAAGCTGGGGTGC GGGGATCCCTTGTCCGTGTAGCATGTGCCAGGTGCCTCCGTCTCA

vector ← 48 bp homology arm → *neurod1*  
Reference AGGAAGTCCCAGCCCTCCGTACGGTACAATGGACAGCTCTCACATCTTTACGTCAAGC  
F0#1, F1#1 AGGAAGTCCCAGCCCTCCGTACGGTACAATGGACAGCTCTCACATCTTTACGTCAAGC  
F0#1, F1#2 AGGAAGTCCCAGCCCTCCGTACGGTACAATGGACAGCTCTCACATCTTTACGTCAAGC

**Supplementary Figure S2.** Sequence analysis of genome/vector junctions in F1 *ascl1b-2A-Cre*, *olig2-2A-Cre* and *neurod1-2A-Cre* transgenic F1 adults. 5' and 3' genome/vector junctions were PCR amplified, TA cloned and sequenced. Sequences were aligned to the reference sequence expected following a precise integration event. Red nucleotides represent the 48 bp homology arms used in the targeting vector. Blue letters represent additional nucleotides used to maintain the reading frame between the targeted exon and 2A-Cre cassette.

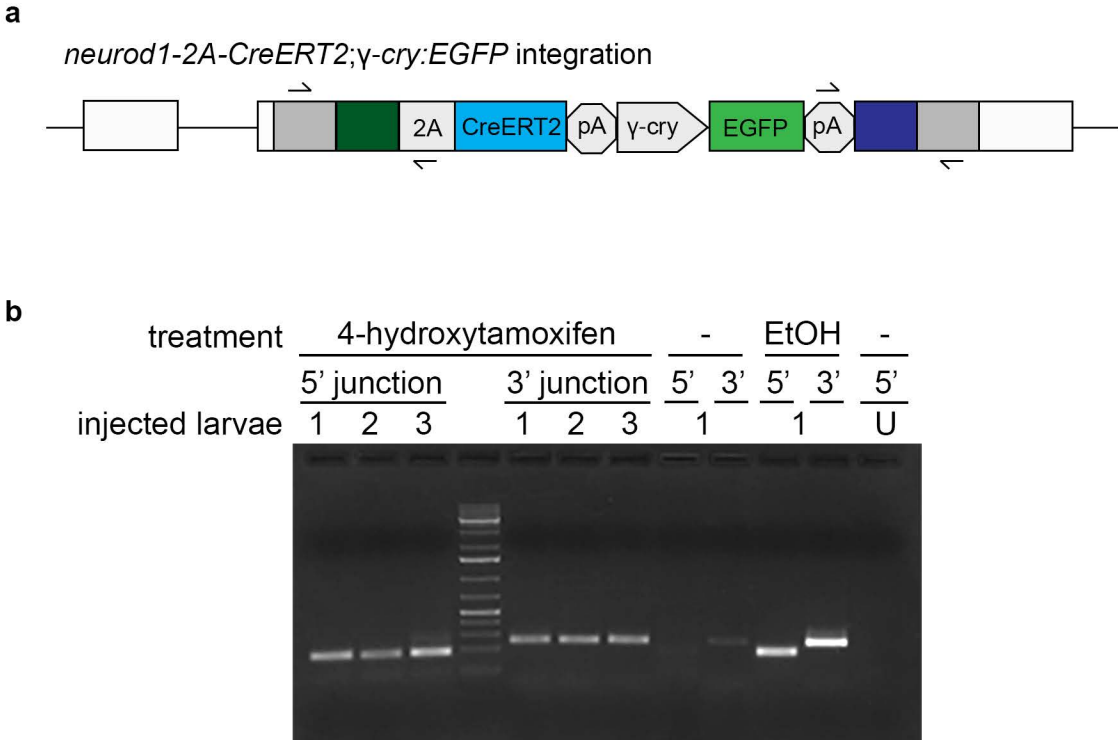

**Supplementary Figure S3. *neurod1-2A-CreERT2*-genomic DNA junction analysis in *nacre ; ubi:Switch 3* dpf larvae after somatic targeting.** Genomic DNA from larvae injected with CRISRP/Cas reagents to integrate the 2A-CreERT2 cassette into *neurod1* exon two and treated with tamoxifen, mock treated, or not treated were analyzed for 5' and 3' junctions by PCR. (a) Diagram illustrating integration at the *neurod1* genomic target site and location of primers for 5' and 3' junction analysis. (b) Both 5' and 3' junction PCR products were amplified from genomic DNA from all larvae injected as embryos. Gel shows results from 3 larvae treated (4-hydroxytamoxifen), 1 larvae mock treated (EtOH), and 1 larvae no treatment (-). U, PCR on uninjected control larvae did not result in a 5' amplification product.
